# Supplementary material for: NcGRA7 and NcROP40 Play a Role in the Virulence of Neospora caninum in a Pregnant Mouse Model
Source: MDPI journal article supplement (doi:10.3390/pathogens11090998), 2022-08-31
Supplement: s1 [file s1]

**Table S1.** Sequences of primers used for cytokine real-time PCR (qPCR).

| Gene                          | Forward Primer               | Reverse Primer               | Reference |
|-------------------------------|------------------------------|------------------------------|-----------|
| <i>beta-actin</i>             | 5'-GGCACCACACCTTCTACAATG-3'  | 5'-TGGATGGCTACGTACATGGCTG-3' | 45        |
| <i>IFN-gamma</i>              | 5'-TGAAAATCCTGCAGAGCCAGAT-3' | 5'-AGCTCATTGAATGCTTGGCG-3'   | 45        |
| <i>IL4</i>                    | 5'-TGACGGCACAGAGCTATTGATG-3' | 5'-TTCTTCGTTGCTGTGAGGACG-3'  | 45        |
| <i>IL10</i>                   | 5'-AGGCGCTGTCATCGATTCTC-3'   | 5'-TGGCCTTGTAGACACCTTGGTC-3' | 45        |
| <i>TNF<math>\alpha</math></i> | 5'-CTGTAGCCACGTCGTAGC-3'     | 5'-TTGAGATCCATGCCGTTG-3'     | 46        |

## References

45. Varona, R.; Cadenas, V.; Gómez, L.; Martínez-A, C.; Márquez, G. CCR6 Regulates CD4+ T-cell-mediated acute graft-versus-host disease responses. *Blood* **2005**, *106*, 18–26. <https://doi.org/10.1182/blood-2004-08-2996>.
46. López-Pérez, I.C.; Collantes-Fernández, E.; Rojo-Montejo, S.; Navarro-Lozano, V.; Risco-Castillo, V.; Pérez-Pérez, V.; Pereira-Bueno, J.; Ortega-Mora, L.M. Effects of *Neospora caninum* infection at mid-gestation on placenta in a pregnant mouse model. *J. Parasitol.* **2010**, *96*, 1017–1020. <https://doi.org/10.1645/GE-2347.1>.
